# Supplementary material for: Aminoallenylidene complexes of ruthenium(ii) from the regioselective addition of secondary amines to butatrienylidene intermediates: a combined experimental and theoretical study of the hindered rotation around the CN-bond
Source: Royal Society of Chemistry journal article supplement (doi:10.1039/b211774f), 2003-01-01
Supplement: b211774f.doc [file b211774f.doc]

Figure S1

Figure S2

Figure S3

Figure captions for Supplemenatry Information

Figure S1. IR spectra recorded during the reduction of complex 2b (a) and the subsequent reoxidation (b).

Figure S2. UV/Vis spectroelectrochemical investigation of the reduction of compound 2b.

**Figure S3.** Calculated energy profile of *trans-*[Cl(dhpm)2RuC3{N(CH3)2}(CH3)]+upon rotation around the CN bond. The N(CH3)2 group is restricted to being planar.
